# Supplementary material
Source: PubMed Central journal article supplement (PMC8256432)
Supplement: NIHMS1713958-supplement-1.pdf [file NIHMS1713958-supplement-1.pdf]

--- Supporting Information ---

# $^{17}\text{O}$ MAS NMR Correlation

## Spectroscopy at High Magnetic Fields

Eric G. Keeler<sup>1,§</sup>, Vladimir K. Michaelis<sup>1,†</sup>, Michael T. Colvin<sup>1,‡</sup>, Ivan Hung<sup>2</sup>, Peter L. Gor'kov<sup>2</sup>, Timothy A. Cross<sup>2</sup>, Zhehong Gan<sup>2</sup>, and Robert G. Griffin<sup>1,\*</sup>

<sup>(1)</sup> Department of Chemistry and Francis Bitter Magnet Laboratory, Massachusetts Institute of Technology,  
Cambridge, Massachusetts, 02139 USA

<sup>(2)</sup> National High Magnetic Field Laboratory, Florida State University, Tallahassee, FL 32310

§ - Current Address: Department of Chemistry, Columbia University, New York, NY, 10027 USA

† - Current Address: Department of Chemistry, University of Alberta, Edmonton, Alberta, T6G 2G2

Canada

‡ - Current Address: Ortho Clinical Diagnostics, Rochester, NY, 14626 USA

\*Corresponding Author: Robert G. Griffin, [rgg@mit.edu](mailto:rgg@mit.edu)

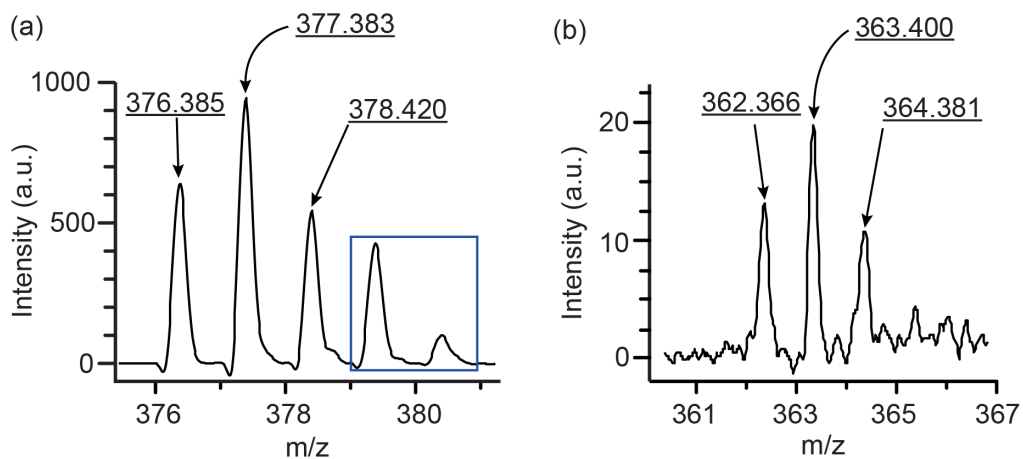

**Figure S1:** MALDI mass spectra of 40% -  $^{17}\text{O}$  labeled Fmoc-L-leucine (a) and Fmoc-L-valine (b). The blue box in (a) is due to the alpha-cyano background from the MALDI matrix. The isotopic enrichments were calculated by taking the integrated peak intensities of the  $^{16}\text{O}/^{16}\text{O}$  species as 0%, the  $^{16}\text{O}/^{17}\text{O}$  species as 50%, and the  $^{17}\text{O}/^{17}\text{O}$  species as 100% enrichment.

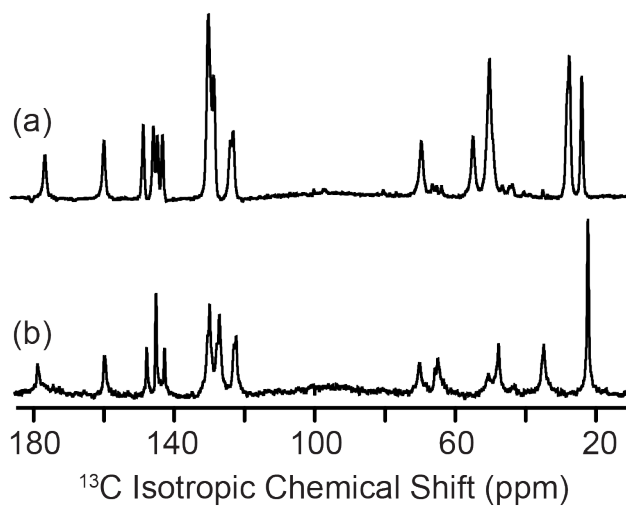

**Figure S2:**  $^{13}\text{C}\{^1\text{H}\}$  CPMAS NMR spectra of Fmoc-L-leucine (a) and Fmoc-L-valine (b) at 11.7 T ( $\omega_{\text{OH}}/2\pi = 500$  MHz) with  $\omega_{\text{R}}/2\pi = 10$  kHz and  $\gamma B_1/2\pi = 100$  kHz  $^1\text{H}$  TPPM decoupling.

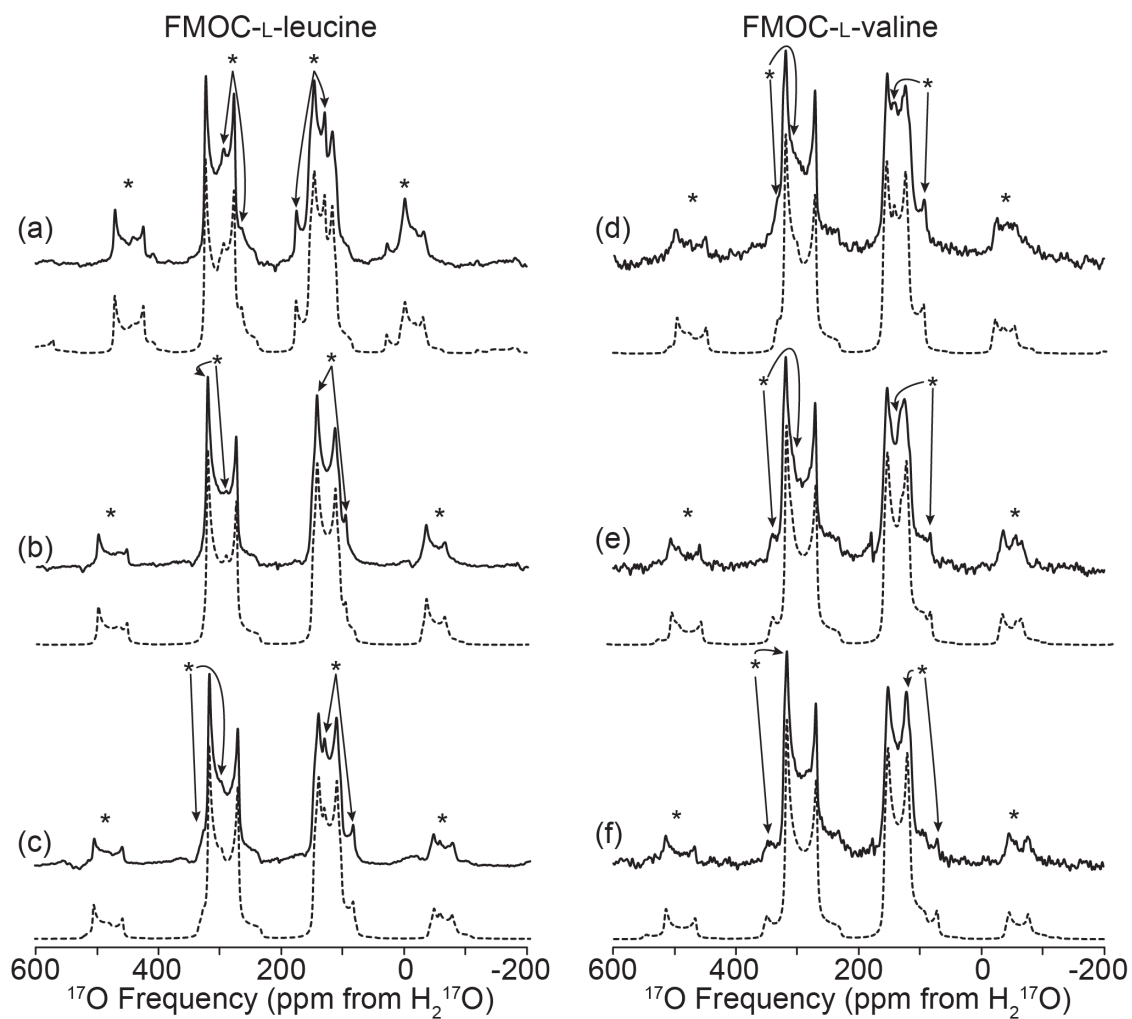

**Figure S3:** Oxygen-17 experimental (solid) and simulated (dashed) MAS NMR spectra of FMOC-L-leucine (right) and FMOC-L-valine (left) at 17.6 T ( $\omega_{0H}/2\pi = 750$  MHz).  $\omega_R/2\pi = 15$  kHz (a),  $\omega_R/2\pi = 17$  kHz (b),  $\omega_R/2\pi = 18$  kHz (c) for FMOC-L-leucine and  $\omega_R/2\pi = 18$  kHz (d),  $\omega_R/2\pi = 19$  kHz (e),  $\omega_R/2\pi = 20$  kHz (f) for FMOC-L-valine. Spinning sidebands are noted by astericks (\*). NMR parameters used in spectral simulations are given in Table 4.

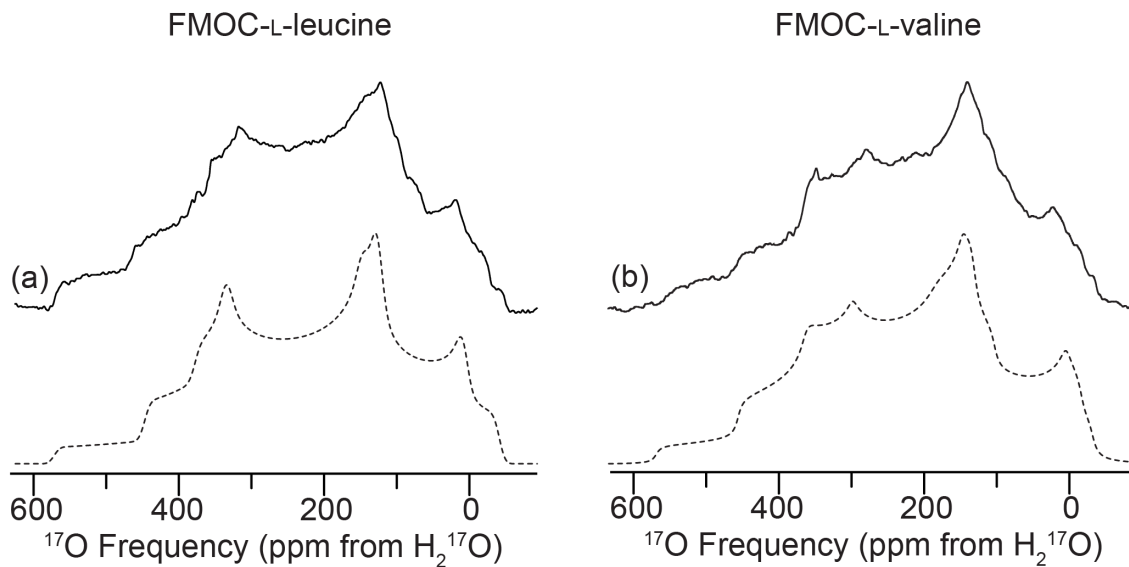

**Figure S4:** Oxygen-17 experimental (solid) and simulated (dashed) non-spinning NMR spectra of FMOC-L-leucine (a) and FMOC-L-valine (b) at 17.6 T ( $\omega_{0H}/2\pi = 750$  MHz) with  $\gamma_{B1}/2\pi = 100$  kHz continuous-wave  $^1H$  decoupling. NMR parameters used in spectral simulations are given in Table 4.

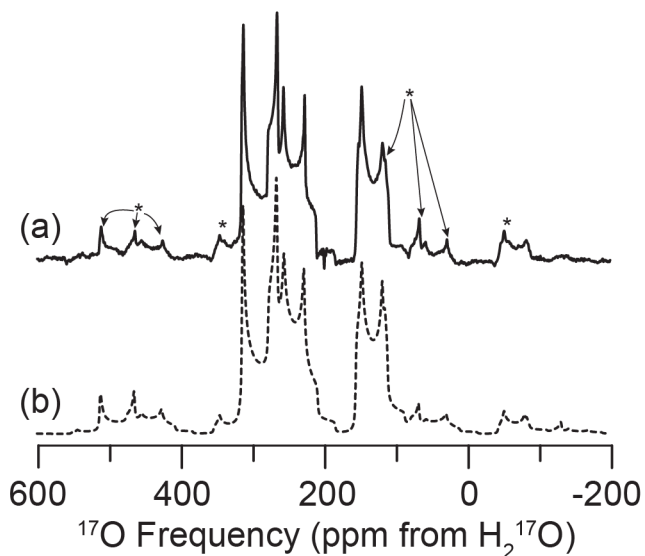

**Figure S5:** Oxygen-17 MAS NMR spectrum of N-Ac-VL (a), simulation of MAS NMR spectrum (b) at 17.6 T ( $\omega_{0H}/2\pi = 750$  MHz). Spectra were acquired with  $\omega_R/2\pi = 20$  kHz, spinning sidebands are noted by asterisks (\*). NMR parameters used in spectral simulations are given in Table 4.

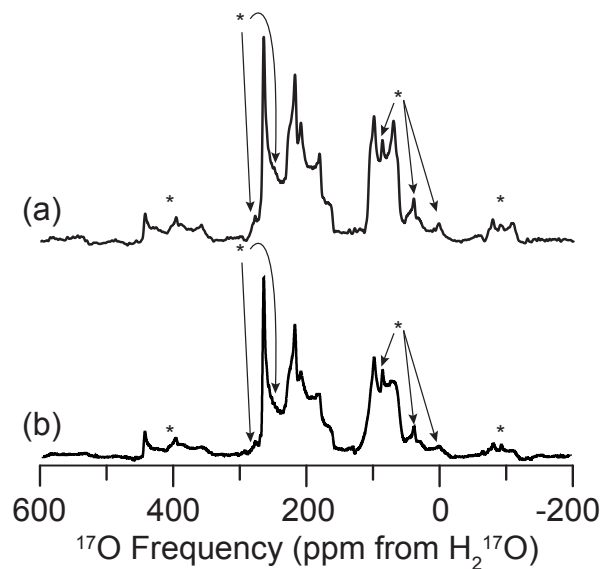

**Figure S6:** Oxygen-17 MAS NMR spectrum of N-Ac-VL without (a), and with (b)  $\gamma B_1/2\pi = 100$  kHz continuous-wave  $^1\text{H}$  decoupling at 17.6 T ( $\omega_{0\text{H}}/2\pi = 750$  MHz). Spectra were acquired with  $\omega_{\text{R}}/2\pi = 18$  kHz, spinning sidebands are noted by asterisks (\*).

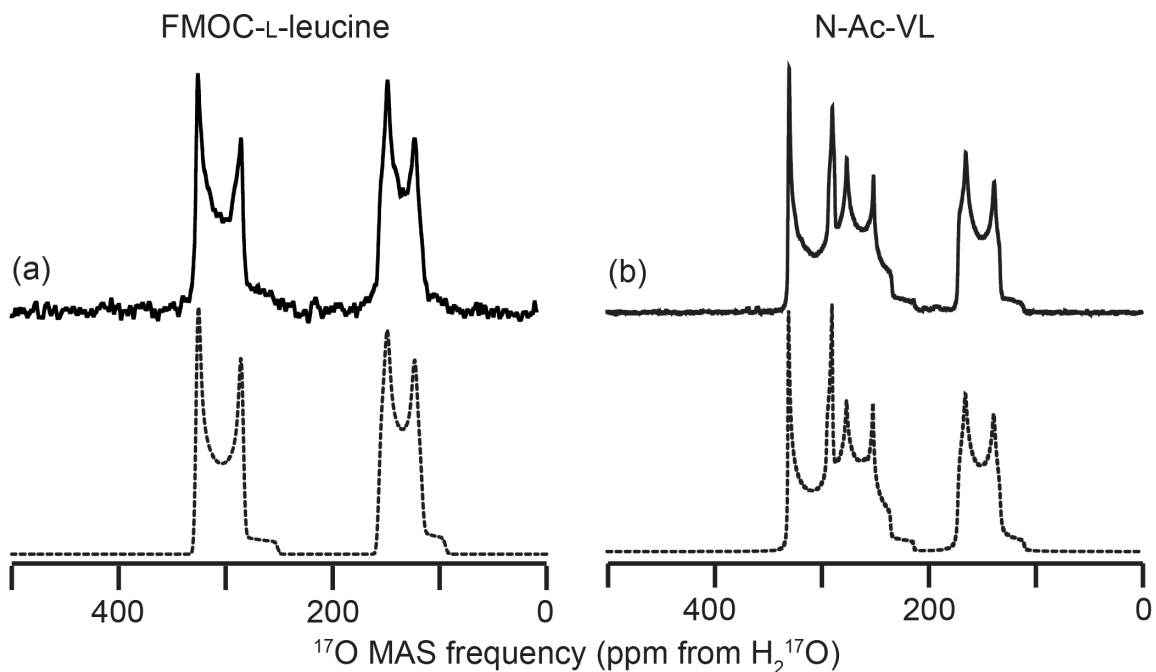

**Figure S7:** Experimental (solid) and simulated (dashed)  $^{17}\text{O}$  MAS NMR of FMOC-L-leucine (a) and N-Ac-VL (b) at 18.8 T ( $\omega_{0\text{H}}/2\pi = 800$  MHz). Spectra were acquired with  $\omega_{\text{R}}/2\pi = 60$  kHz. NMR parameters used in spectral simulations are given in Table 4.

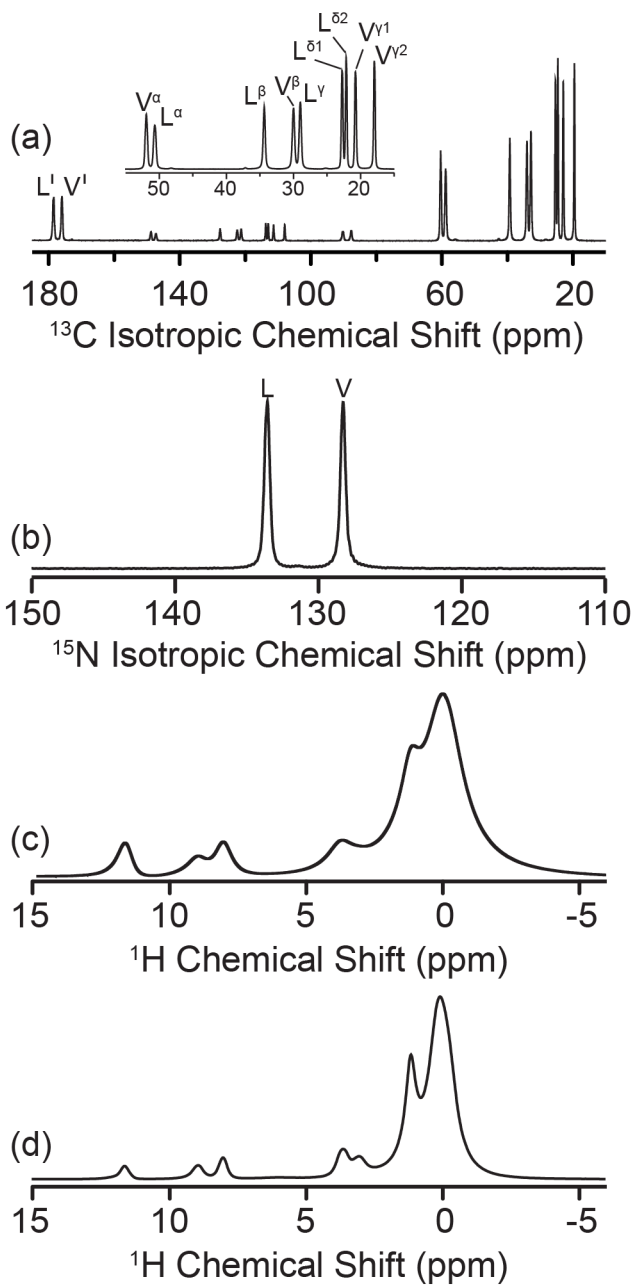

**Figure S8:**  $^{13}\text{C}$ ,  $^{15}\text{N}$ , and  $^1\text{H}$  MAS NMR of N-Ac-VL at 21.1 T ( $\omega_{\text{OH}}/2\pi = 900$  MHz) with  $\omega_{\text{R}}/2\pi = 20$  kHz.  $^{13}\text{C}\{^1\text{H}\}$  CPMAS NMR spectrum (a),  $^{15}\text{N}\{^1\text{H}\}$  CPMAS spectrum (b), and  $^1\text{H}$  MAS NMR spectrum (c).  $^1\text{H}$  MAS NMR spectrum at 18.8 T with  $\omega_{\text{R}}/2\pi = 60$  kHz (d). Compared to previous NMR studies of N-Ac-VL.<sup>1-3</sup>

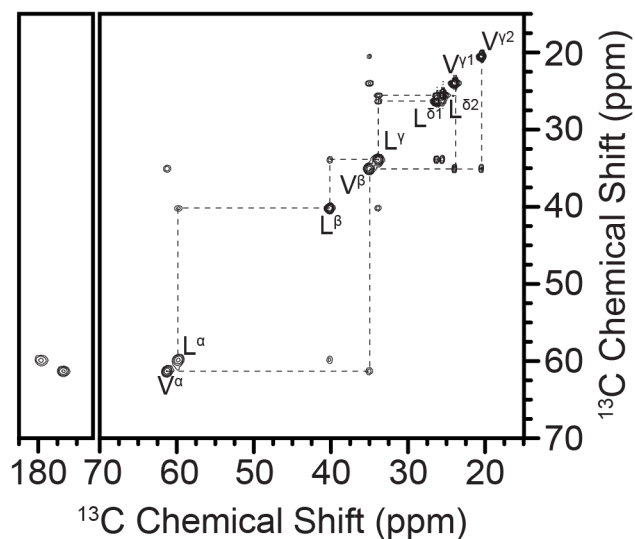

**Figure S9:** Two-dimensional  $^{13}\text{C}$ - $^{13}\text{C}$  RFDR spectrum with 1.6 ms mixing at 11.7 T ( $\omega_{0\text{H}}/2\pi = 500$  MHz) and  $\omega_{\text{R}}/2\pi = 10$  kHz with  $\gamma B_1/2\pi = 100$  kHz continuous wave  $^1\text{H}$  decoupling during evolution and  $\gamma B_1/2\pi = 100$  kHz TPPM  $^1\text{H}$  decoupling during acquisition. Compared to previous study of N-Ac-VL.<sup>2</sup>

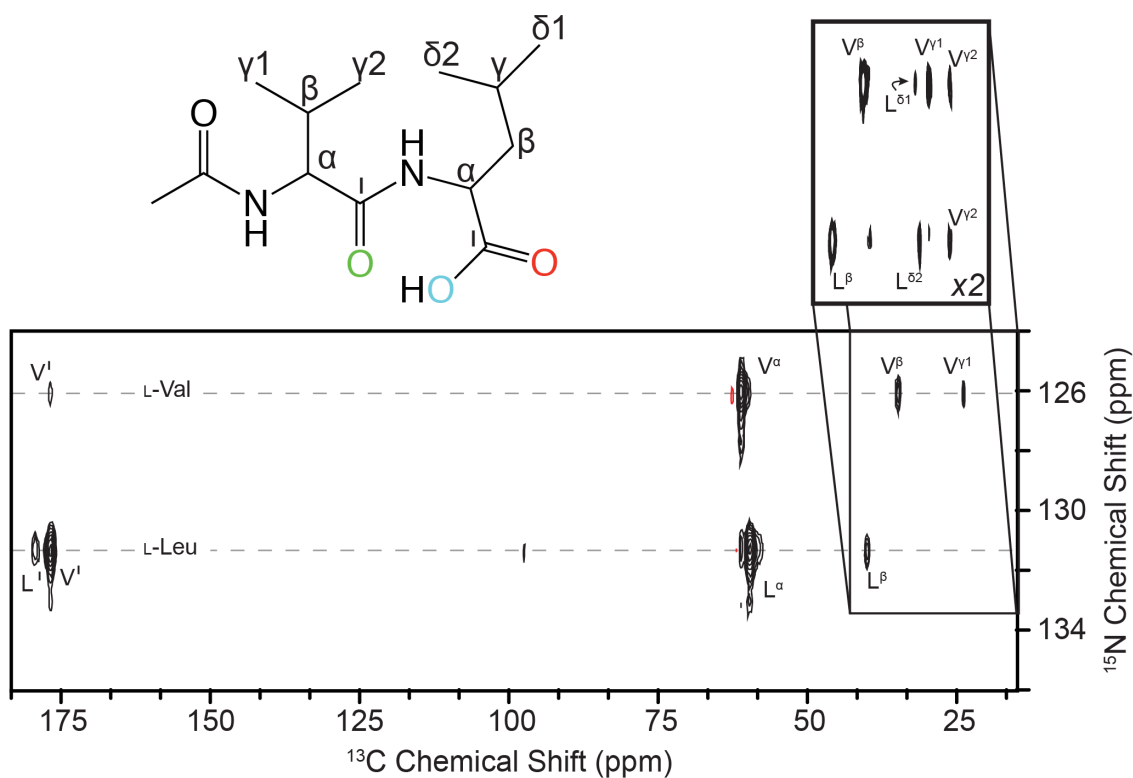

**Figure S10:** Two-dimensional  $^{13}\text{C}$ - $^{15}\text{N}$  ZF-TEDOR spectrum with 2.0 ms mixing at 11.7 T ( $\omega_{0\text{H}}/2\pi = 500$  MHz) and  $\omega_{\text{R}}/2\pi = 10$  kHz with  $\gamma B_1/2\pi = 100$  kHz TPPM  $^1\text{H}$  decoupling during acquisition. Compared to previous study of N-Ac-VL.<sup>2</sup>

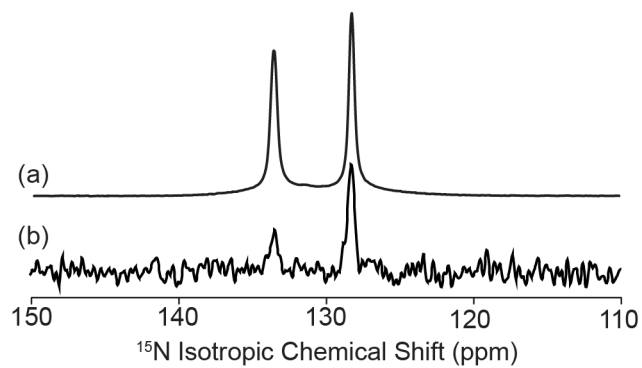

**Figure S11:** Comparison of 1D  $^{15}\text{N}$  CPMAS (a) and  $^{15}\text{N}$ - $^{17}\text{O}$  ZF-TEDOR with 7.88 ms of mixing (b) at 17.6 T ( $\omega_{\text{OH}}/2\pi = 750$  MHz). Spectra acquired with  $\omega_{\text{R}}/2\pi = 18$  kHz,  $^{15}\text{N}$   $\gamma\text{B}_1/2\pi = 36$  kHz, and  $^1\text{H}$   $\gamma\text{B}_1/2\pi = 100$  kHz TPPM decoupling.



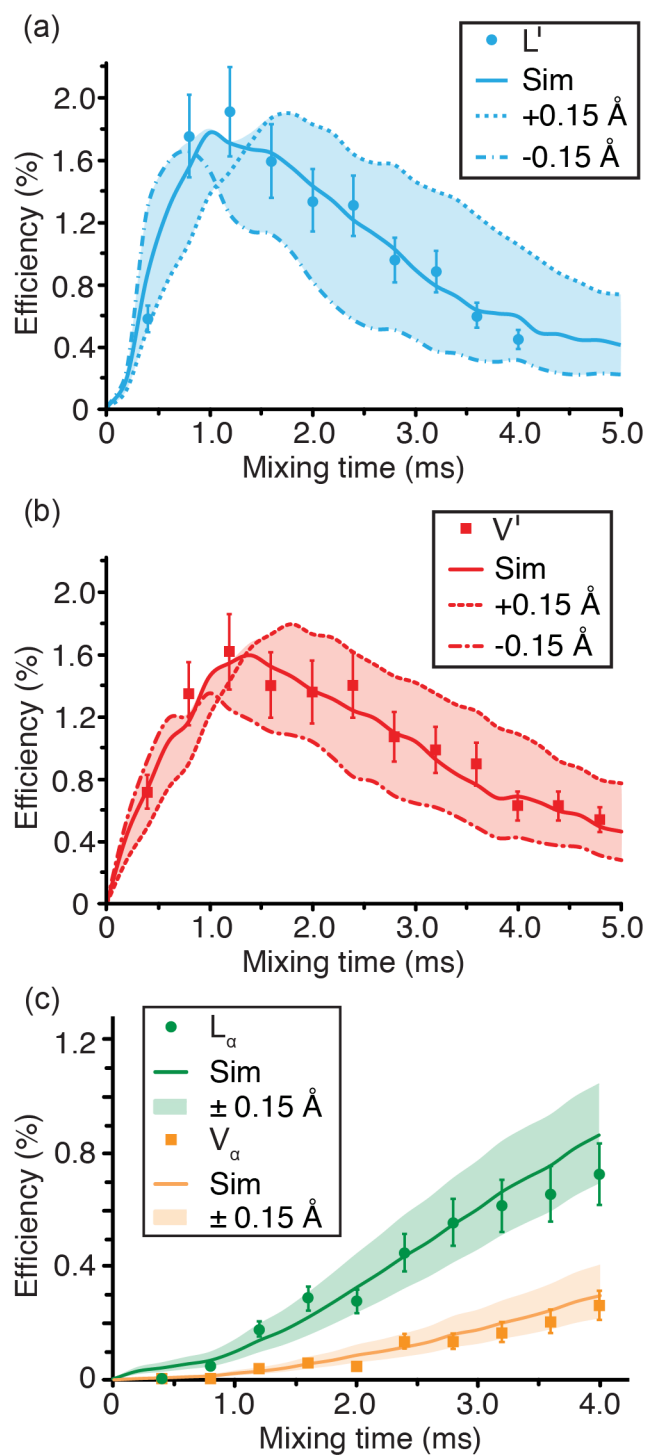

**Figure S12:** Experimental and simulated, including  $\pm 0.15$  Å errors, 1D  $^{13}\text{C}$ - $^{17}\text{O}$  ZF-TEDOR buildup curves as a function of mixing time for leucine C' (a), valine C' (b), and Ca (leucine, green circles and valine, yellow squares) (c), at 21.1 T ( $\omega_{\text{OH}}/2\pi = 900$  MHz) with  $\gamma_{\text{B1}}/2\pi$  ( $^{17}\text{O}$ ) = 100 kHz, and 100 kHz TPPM  $^1\text{H}$  decoupling during acquisition. Best fit simulated curves (solid lines) determined using SPINEVOLUTION.<sup>4</sup> Measured  $^{13}\text{C}$ - $^{17}\text{O}$  distances given in Table 5.

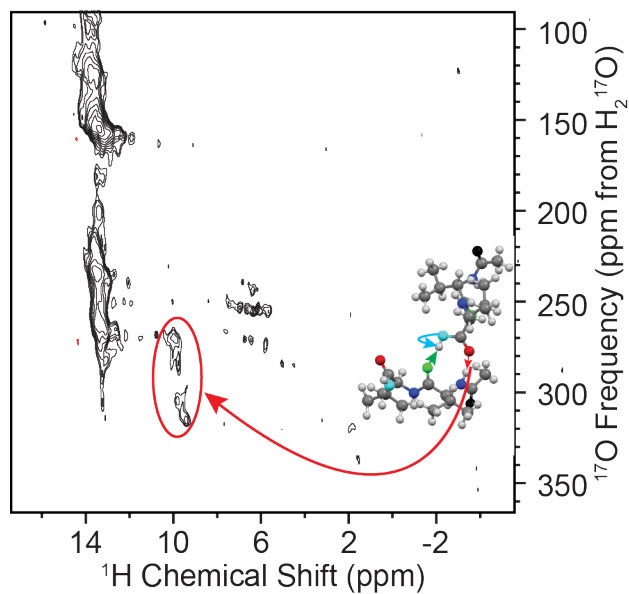

**Figure S13:** Two-dimensional  $^1\text{H}$ - $^{17}\text{O}$   $R^3$ -R-INEPT spectrum with  $R^3 = 100 \mu\text{s}$ . Spectra were acquired with  $\omega_R/2\pi = 20 \text{ kHz}$  at  $17.6 \text{ T}$  ( $\omega_{0\text{H}}/2\pi = 750 \text{ MHz}$ ). The correlation, circled in red, between the leucine amide proton to the leucine CO oxygen (red arrow) is indicated on the crystal structure of N-Ac-VL in the inset.<sup>5</sup>

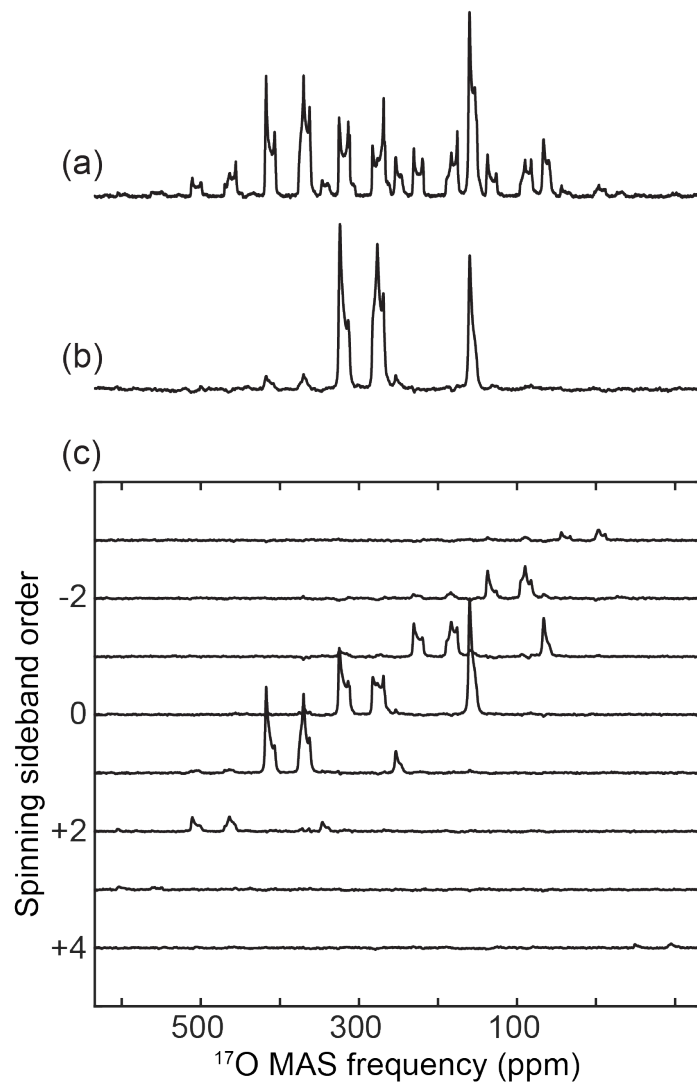

**Figure S14:** Experimental  $^{17}\text{O}$  MAS NMR spectra of N-Ac-VL (a) at 35.2 T ( $\omega_{\text{OH}}/2\pi = 1500$  MHz) with  $\omega_{\text{R}}/2\pi = 19$  kHz. Sum projection of the  $^{17}\text{O}$  MAS NMR spectrum of N-Ac-VL (b) after shearing transform of the direct dimension of the MATPASS spectrum to yield an axis that is equivalent to an infinite spinning frequency MAS spectrum. Two-dimensional  $^{17}\text{O}$  MATPASS spectrum of N-Ac-VL (c) showing the centerband of each oxygen chemical environment for each sideband order.

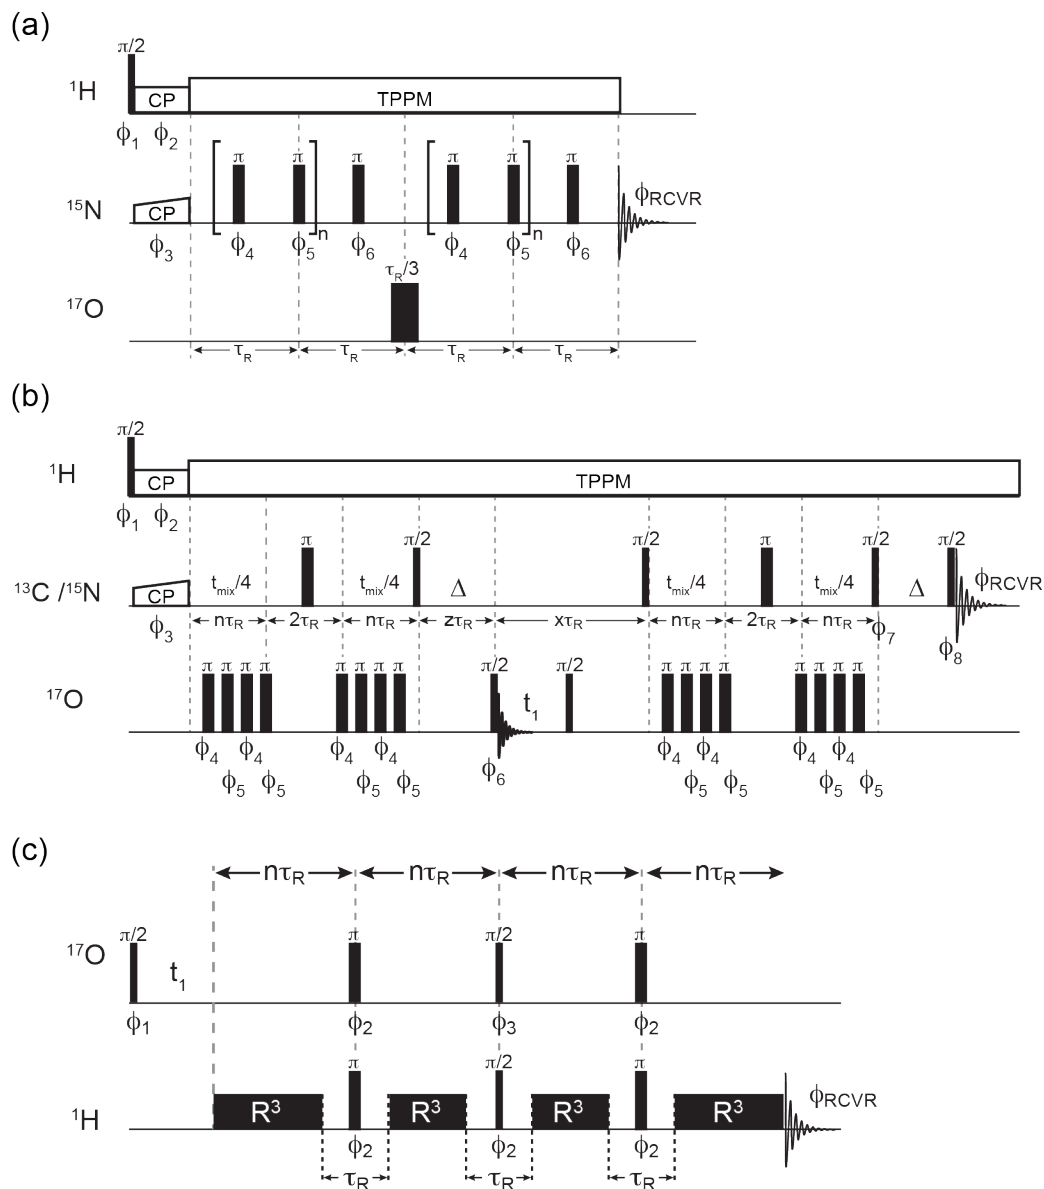

**Figure S15:** Pulse sequences utilized for correlation experiments.  $^{15}\text{N}$ - $^{17}\text{O}$  REAPDOR pulse sequence (a), the phase cycle was:  $\phi_1 = 13, \phi_2 = 1, \phi_3 = 1133\ 2244, \phi_4 = 1, \phi_5 = 2, \phi_6 = 1133\ 2244, \phi_{\text{RCVR}} = 1331\ 2442$ .  $^{15}\text{N}/^{13}\text{C}$ - $^{17}\text{O}$  ZF-TEDOR pulse sequence (b), the phase cycle was:  $\phi_1 = 13, \phi_2 = 1, \phi_3 = 2, \phi_4 = 1, \phi_5 = 2, \phi_6 = 13, \phi_7 = 2244, \phi_8 = 1111\ 2222\ 3333\ 4444, \phi_{\text{RCVR}} = 4224\ 1331\ 2442\ 3113\ 2442\ 3113\ 4224$ .  $^1\text{H}$ - $^{17}\text{O}$   $\text{R}^3$ - $\text{R}$ -INEPT pulse sequence (c), the phase cycle was:  $\phi_1 = 1234, \phi_2 = 1, \phi_3 = 2, \phi_{\text{RCVR}} = 3412$ .

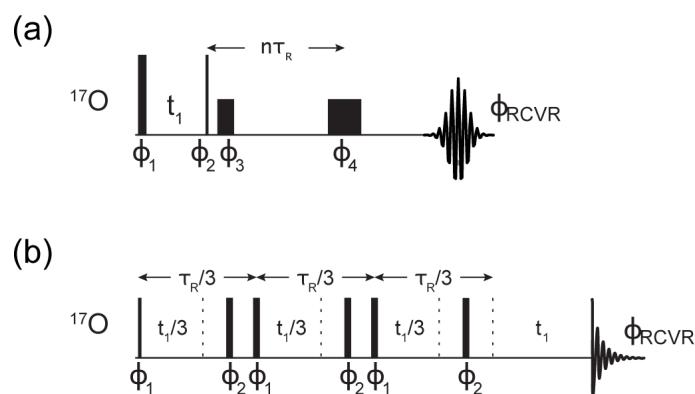

**Figure S16:** Pulse sequences utilized for  $^{17}\text{O}$  NMR experiments at 1500 MHz ( $^1\text{H}$ ). Oxygen-17 3QMAS sequence (a), the phase cycle utilized:  $\phi_1 = 0^\circ, 30^\circ, 60^\circ, 90^\circ, 120^\circ, 150^\circ, 180^\circ, 210^\circ, 240^\circ, 270^\circ, 300^\circ, 330^\circ$ ;  $\phi_2 = 0^\circ$ ;  $\phi_3 = 0^\circ$ ;  $\phi_4 = (0^\circ)*12, (45^\circ)*12, (90^\circ)*12, (135^\circ)*12, (180^\circ)*12, (225^\circ)*12, (270^\circ)*12, (315^\circ)*12$ ;  $\phi_{\text{RCVR}} = 1432\ 1432\ 1431\ 2143\ 2143\ 2143\ 3214\ 3214\ 3214\ 4321\ 4321\ 4321$ .  $^{17}\text{O}$  MATPASS pulse sequence (b), the phase cycle utilized was a 12-step cogwheel phase cycle:  $\phi_1 = 1$ ;  $\phi_2 = 0^\circ, 30^\circ, 60^\circ, 90^\circ, 120^\circ, 150^\circ, 180^\circ, 210^\circ, 240^\circ, 270^\circ, 300^\circ, 330^\circ$ ;  $\phi_{\text{RCVR}} = 1\ 3$ .

---

### References

1. Jaroniec, C. P.; Filip, C.; Griffin, R. G., *J. Am. Chem. Soc.* **2002**, *124*, 10728-10742.
2. Jaroniec, C. P.; Tounge, B. A.; Herzfeld, J.; Griffin, R. G., *J. Am. Chem. Soc.* **2001**, *123*, 3507-3519.
3. Reif, B.; Jaroniec, C. P.; Rienstra, C. M.; Hohwy, M.; Griffin, R. G., *J. Magn. Reson.* **2001**, *151*, 320-327.
4. Veshtort, M.; Griffin, R. G., *J. Magn. Reson.* **2006**, *178*, 248-282.
5. Carroll, P. J.; Stewart, P. L.; Opella, S. J., *Acta Crystallogr., Sect. C: Cryst. Struct. Commun.* **1990**, *46*, 243-246.
